# Supplementary material for: Enhancement of protein production by microalgae Dunaliella salina under mixotrophic conditions using response surface methodology
Source: Royal Society of Chemistry journal article supplement (doi:10.1039/c5ra04546k), 2015-01-01
Supplement: c5ra04546k1.pdf [file c5ra04546k1.pdf]

**Electronic Supplementary Information**  
**Enhancement of protein production by microalgae *Dunaliella salina* under mixotrophic condition using response surface methodology**

S. Kadkhodaei<sup>1</sup>, S. Abbasiliasi<sup>1</sup>, T.J. Shun<sup>2</sup>, H. R. Fard Masoumi<sup>3</sup>, M. S. Mohamed<sup>1</sup>, A. Movahedi<sup>4</sup>, R. Rahim<sup>5</sup>, A. B. Ariff<sup>1</sup>

<sup>1</sup>Department of Bioprocess Technology, Faculty of Biotechnology and Biomolecular Sciences, Universiti Putra Malaysia, 43400 UPM Serdang, Selangor, Malaysia

<sup>2</sup>Institute of Bioscience, Universiti Putra Malaysia, Serdang, Selangor 43300 Malaysia

<sup>3</sup>Department of Chemistry, Faculty of Science, Universiti Putra Malaysia, 43400 Serdang, Selangor, Malaysia

<sup>4</sup>College of Forest Resources and, Environment of Nanjing Forestry University, Nanjing, Jiangsu, 210037, China.

<sup>5</sup>Department of Cell and Molecular Biology, Faculty of Biotechnology and Biomolecular Sciences, Universiti Putra Malaysia, 43400 UPM Serdang, Selangor, Malaysia

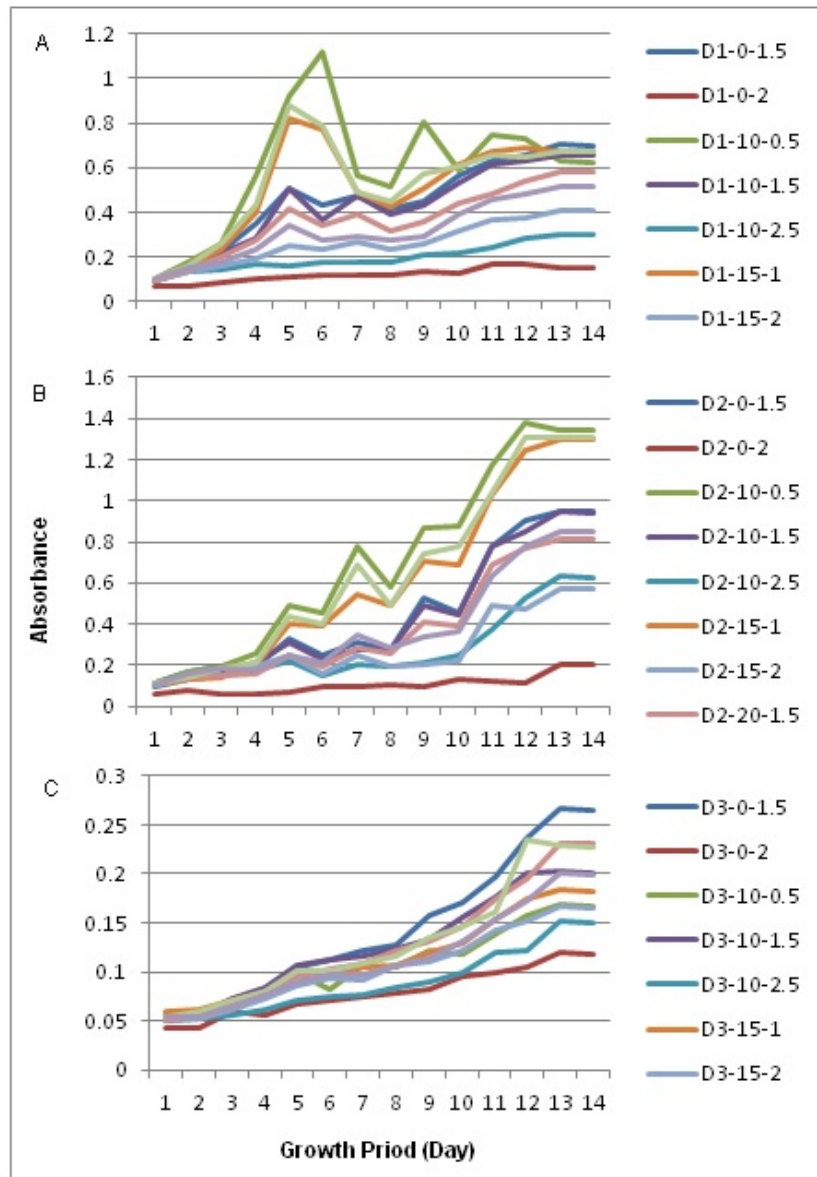

**Supplementary Figure 1.** Growth curves of 3 strains in 9 combinational treatments (run) and 1 control based on the absorbance (cellular chlorophyll content). A=D1, B=D2, C=D3.

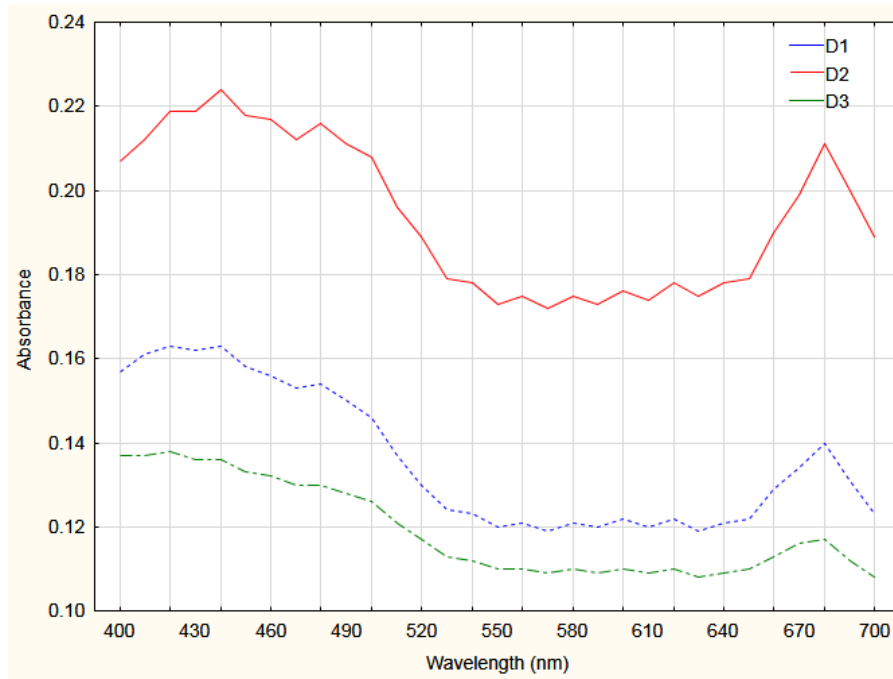

**Supplementary Figure 2.** Absorbance spectral curve (400-700 nm) of *D.salina* strains.

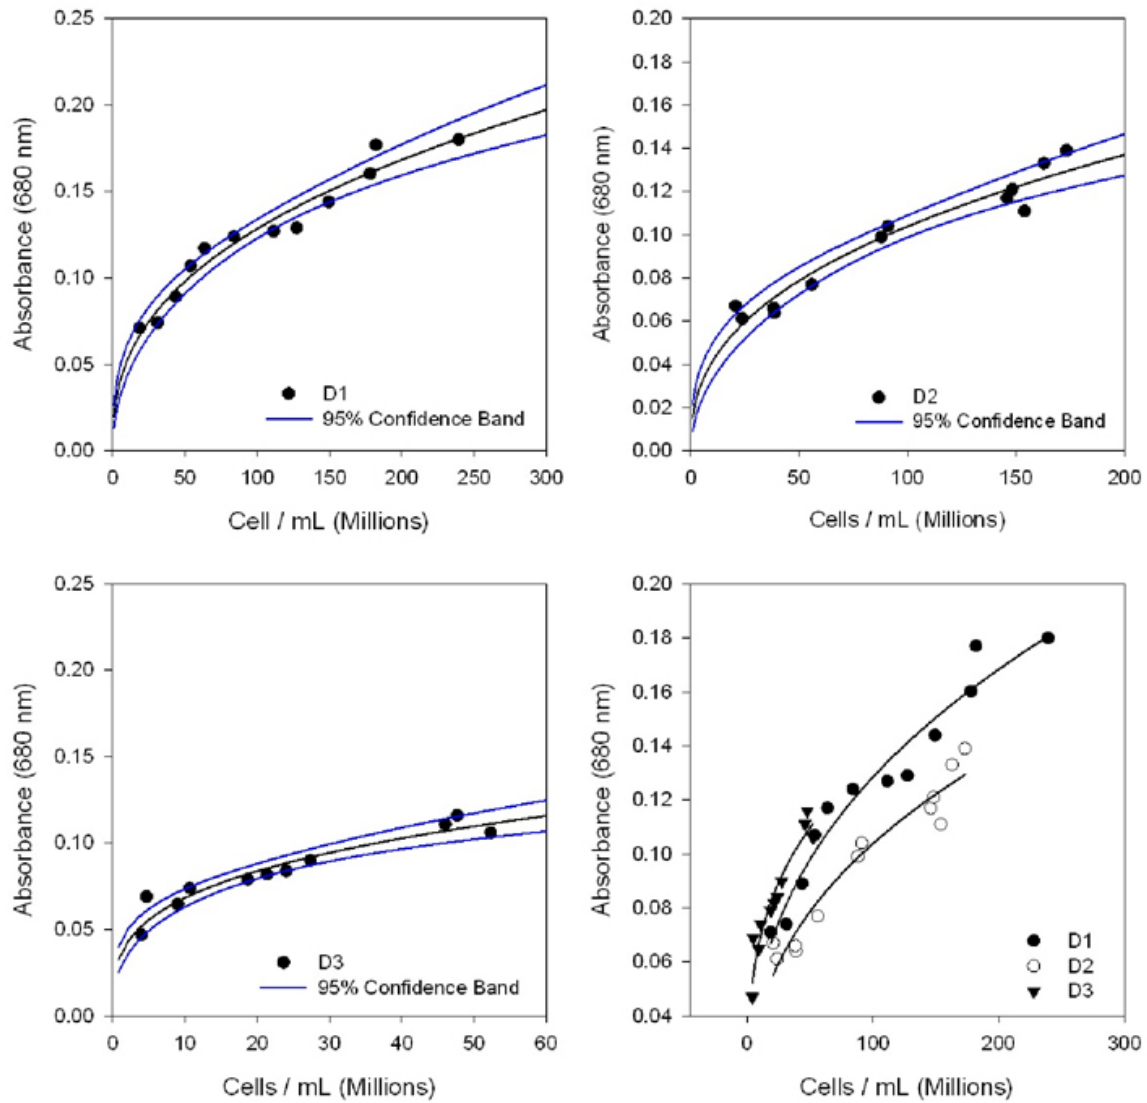

**Supplementary Figure 3.** Relationship between absorbance (680nm) and cell density for *D.salina* strains (D1, D2 and D3). The black lines represent the adjusted absorbance equations. The 5% confidence level has been shown with blue lines. The related correlation fit equations has been provided in Supplementary Table 2.

**Supplementary Table 1.** Statistical parameters of the model developed for biomass through response surface methodology in *D.salina* strains.

| Statistical Parameters | Strain     |        |            |
|------------------------|------------|--------|------------|
|                        | D1         | D2     | D3         |
| R-Squared              | 0.9885     | 0.8608 | 0.8577     |
| Adj R-Squared          | 0.9802     | 0.7614 | 0.7560     |
| Pred R-Squared         | 0.9578     | 0.3421 | 0.4235     |
| Adeq Precision         | 37.319     | 11.012 | 10.886     |
| Std. Dev.              | 0.018      | 0.13   | 0.014      |
| Mean                   | 0.58       | 0.92   | 0.19       |
| C.V. %                 | 3.10       | 13.69  | 7.35       |
| PRESS                  | 8.135E-003 | 0.82   | 5.538E-003 |

**Supplementary Table 2.** Correlation curve fit equations for three *Dunaliella* strains based on optical density versus cell density, expressed using a general power equation.

| Strain    | Equation                                                               | R <sup>2</sup> | Adj R <sup>2</sup> | StE    |
|-----------|------------------------------------------------------------------------|----------------|--------------------|--------|
| <b>D1</b> | $y = 0.0213 x^{0.39}$<br>$X = e^{\{[\ln(A_{680}) + 3.849]/0.39\}}$     | 0.9531         | 0.9485             | 0.0083 |
| <b>D2</b> | $y = 0.0165 x^{0.3996}$<br>$X = e^{\{[\ln(A_{680}) + 4.104]/0.3996\}}$ | 0.9361         | 0.9298             | 0.0075 |
| <b>D3</b> | $y = 0.0347 x^{0.2944}$<br>$X = e^{\{[\ln(A_{680}) + 3.361]/0.3996\}}$ | 0.9234         | 0.9157             | 0.0066 |

Y: absorbance at 680 nm ( $A_{680}$ ), X: cell density (cell/mL)

Adj R<sup>2</sup>: Adjusted R<sup>2</sup>, StE: Standard Error of Estimate
